# Supplementary material for: Pharmacokinetics and Tissue Distribution of Gingerols and Shogaols from Ginger (Zingiber officinale Rosc.) in Rats by UPLC–Q-Exactive–HRMS
Source: PubMed Central journal article supplement (PMC6384666; doi:10.3390/molecules24030512), 2019-01-31
Supplement: molecules-24-00512-s001.pdf [file molecules-24-00512-s001.pdf]

## Supplementary Material

### **Pharmacokinetics and tissue distribution of gingerols and shogaols from ginger (*Zingiber officinale* Rosc.) in rats by UPLC-Q-Exactive-HRMS**

Ling-ling Li<sup>1,2</sup>, Ying Cui<sup>1,2\*</sup>, Xing-han Guo<sup>1</sup>, Kai Ma<sup>3</sup>, Ping Tian<sup>3</sup>, Jing Feng<sup>1</sup>, and Jun-Ming Wang<sup>1</sup>

<sup>1</sup> School of Pharmacy, Henan University of Chinese Medicine, 156 Jinshui east Road, Zhengzhou 450046, China; openleeling@163.com (L.L.); gxh5508@163.com (X.G.); fj.xyz@163.com (J.F.); mjw98@126.com (J.W.)

<sup>2</sup> Collaborative Innovation Center for Respiratory Disease Diagnosis and Treatment & Chinese Medicine Development of Henan Province, 156 Jinshui east Road, Zhengzhou 450046, China

<sup>3</sup> Henan Province Chinese Medicine Research Institute; zzm1968@126.com (K.M.); tianping082@163.com (P.T.)

\* Correspondence: cyexin@hactcm.edu.cn (Y.C.); Tel.: +86-371-8653-5313 (Y.C.)

Table S1: Summary of regression equations, linear ranges, correlation coefficients and LLOQ of eight analytes in rat plasma and tissues.

| Analytes   | Plasma/tissues | Regression equation                      | Linear range (ng/mL) | r      | LLOQ (ng/mL) |
|------------|----------------|------------------------------------------|----------------------|--------|--------------|
| 6-gingerol | Plasma         | $Y=4.4\times 10^{-3}X+2.4\times 10^{-3}$ | 2.0-500.0            | 0.9992 | 2.0          |
|            | Heart          | $Y=6.1\times 10^{-4}X+1.9\times 10^{-3}$ | 2.0-500.0            | 0.9963 | 2.0          |
|            | Liver          | $Y=3.8\times 10^{-4}X+4.8\times 10^{-3}$ | 2.0-500.0            | 0.9982 | 2.0          |
|            | Spleen         | $Y=7.7\times 10^{-4}X+5.1\times 10^{-3}$ | 2.0-500.0            | 0.9995 | 2.0          |
|            | Lung           | $Y=5.8\times 10^{-4}X+2.4\times 10^{-3}$ | 2.0-500.0            | 0.9946 | 2.0          |
|            | Kidney         | $Y=9.9\times 10^{-4}X+2.2\times 10^{-3}$ | 2.0-500.0            | 0.9976 | 2.0          |
|            | Stomach        | $Y=5.3\times 10^{-4}X+9.2\times 10^{-3}$ | 39.9-5000.0          | 0.9995 | 39.9         |
|            | Intestine      | $Y=8.3\times 10^{-4}X+1.0\times 10^{-2}$ | 15.6-2000.0          | 0.9970 | 15.6         |
|            | Brain          | $Y=5.0\times 10^{-4}X+1.1\times 10^{-2}$ | 2.0-500.0            | 0.9976 | 2.0          |
| 6-shogaol  | Plasma         | $Y=1.9\times 10^{-3}X+1.4\times 10^{-3}$ | 2.0-500.0            | 0.9988 | 2.0          |
|            | Heart          | $Y=2.7\times 10^{-3}X+1.3\times 10^{-3}$ | 2.0-500.0            | 0.9964 | 2.0          |
|            | Liver          | $Y=1.9\times 10^{-3}X+1.9\times 10^{-3}$ | 2.0-500.0            | 0.9957 | 2.0          |
|            | Spleen         | $Y=3.3\times 10^{-3}X+1.5\times 10^{-3}$ | 2.0-500.0            | 0.9948 | 2.0          |
|            | Lung           | $Y=1.9\times 10^{-3}X+5.5\times 10^{-3}$ | 2.0-500.0            | 0.9961 | 2.0          |
|            | Kidney         | $Y=4.3\times 10^{-3}X+6.5\times 10^{-3}$ | 2.0-500.0            | 0.9987 | 2.0          |
|            | Stomach        | $Y=2.3\times 10^{-3}X+4.5\times 10^{-3}$ | 39.9-5000.0          | 0.9991 | 39.9         |
|            | Intestine      | $Y=4.8\times 10^{-3}X+2.4\times 10^{-3}$ | 15.6-2000.0          | 0.9986 | 15.6         |
|            | Brain          | $Y=1.8\times 10^{-3}X+2.9\times 10^{-3}$ | 2.0-500.0            | 0.9954 | 2.0          |
| 8-gingerol | Plasma         | $Y=1.2\times 10^{-3}X+2.8\times 10^{-4}$ | 2.0-500.0            | 0.9946 | 2.0          |
|            | Heart          | $Y=3.0\times 10^{-4}X+2.9\times 10^{-3}$ | 2.0-500.0            | 0.9910 | 2.0          |
|            | Liver          | $Y=4.9\times 10^{-4}X-3.2\times 10^{-3}$ | 2.0-500.0            | 0.9949 | 2.0          |
|            | Spleen         | $Y=3.0\times 10^{-4}X-2.8\times 10^{-3}$ | 2.0-500.0            | 0.9941 | 2.0          |
|            | Lung           | $Y=4.9\times 10^{-4}X-5.7\times 10^{-3}$ | 2.0-500.0            | 0.9943 | 2.0          |
|            | Kidney         | $Y=2.3\times 10^{-4}X-5.6\times 10^{-4}$ | 2.0-500.0            | 0.9960 | 2.0          |

|             |           |                                              |             |        |      |
|-------------|-----------|----------------------------------------------|-------------|--------|------|
| 8-shogaol   | Stomach   | $Y=8.2 \times 10^{-4}X - 2.1 \times 10^{-3}$ | 39.9-5000.0 | 0.9941 | 39.9 |
|             | Intestine | $Y=4.6 \times 10^{-4}X + 1.4 \times 10^{-3}$ | 15.6-2000.0 | 0.9952 | 15.6 |
|             | Brain     | $Y=5.8 \times 10^{-4}X + 2.6 \times 10^{-3}$ | 2.0-500.0   | 0.9960 | 2.0  |
|             | Plasma    | $Y=6.2 \times 10^{-4}X + 1.1 \times 10^{-3}$ | 2.0-500.0   | 0.9941 | 2.0  |
|             | Heart     | $Y=4.4 \times 10^{-4}X + 2.6 \times 10^{-3}$ | 2.0-500.0   | 0.9986 | 2.0  |
|             | Liver     | $Y=4.2 \times 10^{-4}X + 5.1 \times 10^{-3}$ | 2.0-500.0   | 0.9925 | 2.0  |
|             | Spleen    | $Y=6.7 \times 10^{-4}X - 1.9 \times 10^{-3}$ | 2.0-500.0   | 0.9938 | 2.0  |
|             | Lung      | $Y=5.8 \times 10^{-4}X + 3.7 \times 10^{-3}$ | 2.0-500.0   | 0.9994 | 2.0  |
|             | Kidney    | $Y=3.6 \times 10^{-4}X + 2.1 \times 10^{-3}$ | 2.0-500.0   | 0.9968 | 2.0  |
|             | Stomach   | $Y=3.9 \times 10^{-4}X + 2.6 \times 10^{-3}$ | 39.9-5000.0 | 0.9956 | 39.9 |
| 10-gingerol | Intestine | $Y=5.6 \times 10^{-4}X - 1.7 \times 10^{-3}$ | 15.6-2000.0 | 0.9984 | 15.6 |
|             | Brain     | $Y=4.7 \times 10^{-4}X - 2.2 \times 10^{-3}$ | 2.0-500.0   | 0.9928 | 2.0  |
|             | Plasma    | $Y=1.3 \times 10^{-3}X + 3.7 \times 10^{-3}$ | 2.0-500.0   | 0.9996 | 2.0  |
|             | Heart     | $Y=4.0 \times 10^{-4}X - 1.5 \times 10^{-4}$ | 2.0-500.0   | 0.9910 | 2.0  |
|             | Liver     | $Y=3.7 \times 10^{-4}X + 6.1 \times 10^{-4}$ | 2.0-500.0   | 0.9937 | 2.0  |
|             | Spleen    | $Y=5.6 \times 10^{-4}X - 2.5 \times 10^{-4}$ | 2.0-500.0   | 0.9942 | 2.0  |
|             | Lung      | $Y=4.4 \times 10^{-4}X + 6.8 \times 10^{-4}$ | 2.0-500.0   | 0.9963 | 2.0  |
|             | Kidney    | $Y=4.0 \times 10^{-4}X - 1.5 \times 10^{-4}$ | 2.0-500.0   | 0.9969 | 2.0  |
|             | Stomach   | $Y=3.0 \times 10^{-4}X + 4.8 \times 10^{-3}$ | 39.9-5000.0 | 0.9942 | 39.9 |
|             | Intestine | $Y=3.9 \times 10^{-4}X + 3.2 \times 10^{-3}$ | 15.6-2000.0 | 0.9943 | 15.6 |
| 10-shogaol  | Brain     | $Y=2.9 \times 10^{-4}X + 6.5 \times 10^{-3}$ | 2.0-500.0   | 0.9950 | 2.0  |
|             | Plasma    | $Y=1.8 \times 10^{-6}X - 2.3 \times 10^{-6}$ | 1.0-250.0   | 0.9985 | 1.0  |
|             | Heart     | $Y=2.3 \times 10^{-6}X + 4.3 \times 10^{-5}$ | 1.0-250.0   | 0.9965 | 1.0  |
|             | Liver     | $Y=2.8 \times 10^{-6}X - 2.0 \times 10^{-5}$ | 1.0-250.0   | 0.9937 | 1.0  |
|             | Spleen    | $Y=2.4 \times 10^{-6}X + 1.7 \times 10^{-5}$ | 1.0-250.0   | 0.9991 | 1.0  |
|             | Lung      | $Y=1.6 \times 10^{-6}X + 3.7 \times 10^{-5}$ | 1.0-250.0   | 0.9963 | 1.0  |

|                       |                                            |                                            |             |        |      |
|-----------------------|--------------------------------------------|--------------------------------------------|-------------|--------|------|
| Zingerone             | Kidney                                     | $Y=4.4 \times 10^{-6}X+6.7 \times 10^{-5}$ | 1.0-250.0   | 0.9948 | 1.0  |
|                       | Stomach                                    | $Y=2.8 \times 10^{-6}X+2.1 \times 10^{-5}$ | 15.6-2000.0 | 0.9918 | 15.6 |
|                       | Intestine                                  | $Y=2.9 \times 10^{-6}X+2.7 \times 10^{-5}$ | 15.6-2000.0 | 0.9941 | 15.6 |
|                       | Brain                                      | $Y=4.9 \times 10^{-6}X-1.9 \times 10^{-5}$ | 1.0-250.0   | 0.9966 | 1.0  |
|                       | Plasma                                     | $Y=6.5 \times 10^{-3}X+3.3 \times 10^{-2}$ | 2.0-500.0   | 0.9977 | 2.0  |
|                       | Heart                                      | $Y=5.5 \times 10^{-4}X+5.7 \times 10^{-3}$ | 2.0-500.0   | 0.9984 | 2.0  |
|                       | Liver                                      | $Y=3.4 \times 10^{-4}X-2.7 \times 10^{-3}$ | 2.0-500.0   | 0.9990 | 2.0  |
|                       | Spleen                                     | $Y=4.4 \times 10^{-4}X+5.6 \times 10^{-3}$ | 2.0-500.0   | 0.9994 | 2.0  |
|                       | Lung                                       | $Y=5.1 \times 10^{-4}X-4.2 \times 10^{-3}$ | 2.0-500.0   | 0.9934 | 2.0  |
|                       | Kidney                                     | $Y=4.9 \times 10^{-4}X+4.4 \times 10^{-3}$ | 2.0-500.0   | 0.9954 | 2.0  |
| 6-isodehydrogingenone | Stomach                                    | $Y=4.0 \times 10^{-4}X+8.5 \times 10^{-3}$ | 39.9-5000.0 | 0.9992 | 39.9 |
|                       | Intestine                                  | $Y=4.5 \times 10^{-4}X-1.0 \times 10^{-2}$ | 15.6-2000.0 | 0.9953 | 15.6 |
|                       | Brain                                      | $Y=2.9 \times 10^{-4}X+8.4 \times 10^{-3}$ | 2.0-500.0   | 0.9970 | 2.0  |
|                       | Plasma                                     | $Y=1.3 \times 10^{-2}X-1.2 \times 10^{-2}$ | 1.0-250.0   | 0.9988 | 1.0  |
|                       | Heart                                      | $Y=4.8 \times 10^{-2}X+1.7 \times 10^{-2}$ | 1.0-250.0   | 0.9994 | 1.0  |
|                       | Liver                                      | $Y=2.3 \times 10^{-2}X-4.2 \times 10^{-3}$ | 1.0-250.0   | 0.9944 | 1.0  |
|                       | Spleen                                     | $Y=3.8 \times 10^{-2}X+1.9 \times 10^{-2}$ | 1.0-250.0   | 0.9931 | 1.0  |
|                       | Lung                                       | $Y=5.8 \times 10^{-2}X+1.2 \times 10^{-2}$ | 1.0-250.0   | 0.9954 | 1.0  |
|                       | Kidney                                     | $Y=3.4 \times 10^{-2}X+6.8 \times 10^{-3}$ | 1.0-250.0   | 0.9941 | 1.0  |
|                       | Stomach                                    | $Y=6.5 \times 10^{-3}X-1.4 \times 10^{-3}$ | 7.8-2000.0  | 0.9985 | 7.8  |
| Intestine             | $Y=8.9 \times 10^{-2}X+3.1 \times 10^{-2}$ | 7.8-2000.0                                 | 0.9958      | 7.8    |      |
| Brain                 | $Y=4.8 \times 10^{-3}X+2.2 \times 10^{-2}$ | 1.0-250.0                                  | 0.9927      | 1.0    |      |

X represented the concentration (ng/mL) and Y represented the area ratio.

Table S2: The intra-day and inter-day precisions and accuracies, extraction recoveries, matrix effects of the eight analytes in rat plasma and tissues (n = 6).

| Analytes   | Plasma/<br>tissues | C <sub>nom</sub><br>(ng/mL) | Intra-day                   |                     |                   | Inter-day                   |                     |                   | Extraction recovery<br>Mean ± S.D.<br>(%) | Matrix effect<br>Mean ± S.D.<br>(%) |
|------------|--------------------|-----------------------------|-----------------------------|---------------------|-------------------|-----------------------------|---------------------|-------------------|-------------------------------------------|-------------------------------------|
|            |                    |                             | C <sub>obs</sub><br>(ng/mL) | Precision<br>(RSD%) | Accuracy<br>(RE%) | C <sub>obs</sub><br>(ng/mL) | Precision<br>(RSD%) | Accuracy<br>(RE%) |                                           |                                     |
| 6-gingerol | Plasma             | 62.5                        | 66.8                        | 4.8                 | 6.9               | 68.0                        | 5.3                 | 8.7               | 103.8±3.9                                 | 95.3±5.5                            |
|            |                    | 250.0                       | 242.8                       | 2.6                 | -2.9              | 245.1                       | 2.5                 | -2.0              | 94.6±4.3                                  | 97.2±2.3                            |
|            |                    | 500.0                       | 485.4                       | 3.8                 | -2.9              | 484.7                       | 3.7                 | -3.1              | 96.9±5.4                                  | 100.5±4.6                           |
|            | Heart              | 62.5                        | 66.4                        | 3.7                 | 6.2               | 67.6                        | 4.9                 | 8.2               | 107.4±3.9                                 | 97.2±5.6                            |
|            |                    | 250.0                       | 246.4                       | 2.9                 | -1.5              | 245.8                       | 2.6                 | -1.7              | 97.2±2.0                                  | 96.2±2.1                            |
|            |                    | 500.0                       | 488.7                       | 5.8                 | -2.3              | 487.0                       | 4.6                 | -2.6              | 97.0±4.2                                  | 97.7±5.1                            |
|            | Liver              | 62.5                        | 66.2                        | 3.4                 | 5.9               | 66.9                        | 4.9                 | 7.0               | 97.3±3.4                                  | 98.1±5.7                            |
|            |                    | 250.0                       | 243.5                       | 3.1                 | -2.6              | 245.3                       | 2.8                 | -1.9              | 97.4±2.0                                  | 96.6±2.6                            |
|            |                    | 500.0                       | 488.7                       | 4.8                 | -2.3              | 486.9                       | 3.9                 | -2.6              | 97.3±3.4                                  | 100.9±5.0                           |
|            | Spleen             | 62.5                        | 66.2                        | 3.4                 | 5.9               | 67.2                        | 4.0                 | 7.5               | 107.8±4.0                                 | 98.5±4.0                            |
|            |                    | 250.0                       | 244.3                       | 3.6                 | -2.3              | 245.1                       | 2.5                 | -2.0              | 98.3±2.0                                  | 95.6±1.5                            |
|            |                    | 500.0                       | 491.3                       | 3.7                 | -1.7              | 488.4                       | 4.1                 | -2.3              | 97.1±4.1                                  | 100.4±4.7                           |
|            | Lung               | 62.5                        | 65.5                        | 6.2                 | 4.8               | 67.1                        | 6.1                 | 7.3               | 107.0±5.8                                 | 101.1±4.8                           |
|            |                    | 250.0                       | 243.8                       | 3.3                 | -2.5              | 245.8                       | 2.9                 | -1.7              | 98.0±2.5                                  | 93.9±5.3                            |
|            |                    | 500.0                       | 486.7                       | 4.2                 | -2.7              | 486.3                       | 4.2                 | -2.8              | 98.3±3.7                                  | 95.9±2.2                            |
|            | Kidney             | 62.5                        | 66.2                        | 3.4                 | 5.9               | 67.5                        | 4.7                 | 8.0               | 107.5±4.3                                 | 101.0±4.5                           |
|            |                    | 250.0                       | 243.8                       | 3.3                 | -2.5              | 245.8                       | 2.6                 | -1.7              | 98.0±2.5                                  | 99.5±5.4                            |
|            |                    | 500.0                       | 486.6                       | 4.1                 | -2.7              | 485.8                       | 4.0                 | -2.8              | 96.3±3.5                                  | 97.1±2.7                            |
|            | Stomach            | 62.5                        | 66.5                        | 5.5                 | 6.4               | 67.8                        | 5.8                 | 8.4               | 109.8±6.2                                 | 100.2±4.4                           |
|            |                    | 250.0                       | 243.2                       | 3.6                 | -2.7              | 245.5                       | 2.9                 | -1.8              | 99.3±2.6                                  | 96.1±6.8                            |
|            |                    | 500.0                       | 482.4                       | 4.7                 | -3.5              | 482.9                       | 4.1                 | -3.4              | 97.1±3.5                                  | 97.0±3.2                            |
| Intestine  | 62.5               | 66.2                        | 3.3                         | 5.9                 | 67.7              | 5.1                         | 8.2                 | 109.2±4.7         | 100.8±4.0                                 |                                     |

|           |        |       |       |      |       |       |      |           |           |           |
|-----------|--------|-------|-------|------|-------|-------|------|-----------|-----------|-----------|
| 6-shogaol | Brain  | 250.0 | 244.5 | 3.7  | -2.2  | 245.2 | 2.9  | -1.9      | 98.2±2.7  | 99.9±5.7  |
|           |        | 500.0 | 484.7 | 4.1  | -3.1  | 485.0 | 4.0  | -3.0      | 96.8±3.6  | 96.2±2.7  |
|           |        | 62.5  | 66.4  | 8.4  | 6.2   | 67.9  | 6.6  | 8.6       | 109.8±6.1 | 98.3±3.6  |
|           | Plasma | 250.0 | 242.9 | 3.7  | -2.8  | 245.0 | 3.0  | -2.0      | 98.4±2.6  | 96.3±5.0  |
|           |        | 500.0 | 481.3 | 5.0  | -3.7  | 482.9 | 4.2  | -3.4      | 96.7±3.7  | 97.2±2.9  |
|           |        | 62.5  | 63.7  | 2.1  | 1.9   | 63.9  | 2.3  | 2.2       | 102.3±1.7 | 98.0±1.5  |
|           | Heart  | 250.0 | 245.1 | 3.5  | -2.0  | 247.1 | 5.1  | -1.2      | 97.8±4.0  | 96.3±4.7  |
|           |        | 500.0 | 481.7 | 4.0  | -3.7  | 486.1 | 4.2  | -2.8      | 94.1±4.1  | 99.4±4.9  |
|           |        | 62.5  | 63.0  | 2.1  | 0.8   | 63.4  | 2.7  | 1.5       | 101.5±2.6 | 98.2±2.8  |
|           | Liver  | 250.0 | 243.7 | 3.2  | -2.5  | 246.3 | 4.9  | -1.5      | 98.9±5.1  | 96.5±4.5  |
|           |        | 500.0 | 490.2 | 3.7  | -2.0  | 488.2 | 4.3  | -2.4      | 97.2±3.7  | 96.9±4.0  |
|           |        | 62.5  | 63.4  | 4.4  | 1.4   | 64.0  | 3.4  | 2.4       | 101.1±2.9 | 96.5±3.3  |
|           | Spleen | 250.0 | 245.4 | 3.0  | -1.8  | 248.3 | 4.7  | -0.7      | 97.9±4.0  | 97.3±4.7  |
|           |        | 500.0 | 488.3 | 3.8  | -2.3  | 487.3 | 4.0  | -2.5      | 96.9±4.1  | 100.1±4.7 |
|           |        | 62.5  | 64.0  | 2.9  | 2.4   | 64.0  | 2.5  | 2.4       | 102.5±2.5 | 98.2±5.4  |
|           | Lung   | 250.0 | 246.7 | 3.5  | -1.3  | 246.6 | 4.4  | -1.4      | 97.9±3.6  | 96.0±2.2  |
|           |        | 500.0 | 482.7 | 4.3  | -3.5  | 485.3 | 4.6  | -2.9      | 97.0±4.5  | 95.1±3.5  |
|           |        | 62.5  | 64.0  | 2.1  | 2.4   | 63.9  | 2.1  | 2.2       | 101.8±2.2 | 99.3±4.3  |
|           | Kidney | 250.0 | 244.4 | 3.9  | -2.2  | 246.5 | 5.4  | -1.4      | 97.7±4.8  | 97.6±2.3  |
|           |        | 500.0 | 483.3 | 4.2  | -3.3  | 486.3 | 4.2  | -2.7      | 97.6±3.5  | 95.5±4.8  |
| 62.5      |        | 63.4  | 2.7   | 1.4  | 63.6  | 2.8   | 1.7  | 102.3±2.0 | 100.4±4.6 |           |
| Stomach   | 250.0  | 245.7 | 3.9   | -1.7 | 247.1 | 5.3   | -1.2 | 99.3±4.3  | 96.9±3.1  |           |
|           | 500.0  | 476.5 | 5.0   | -4.7 | 484.2 | 4.5   | -3.2 | 95.9±4.2  | 96.4±6.0  |           |
|           | 62.5   | 63.3  | 3.1   | 1.2  | 63.7  | 2.8   | 1.9  | 103.4±1.4 | 101.5±3.5 |           |
|           |        | 250.0 | 244.1 | 4.4  | -2.4  | 246.5 | 5.4  | -1.4      | 100.6±4.9 | 98.1±2.8  |
|           |        | 500.0 | 481.1 | 4.6  | -3.8  | 486.6 | 4.5  | -2.7      | 98.5±3.9  | 97.5±5.8  |

|            |           |       |       |      |       |       |      |           |           |           |
|------------|-----------|-------|-------|------|-------|-------|------|-----------|-----------|-----------|
| 8-gingerol | Intestine | 62.5  | 64.1  | 3.1  | 2.6   | 64.1  | 2.7  | 2.6       | 102.3±3.1 | 97.4±4.9  |
|            |           | 250.0 | 244.3 | 4.6  | -2.3  | 246.7 | 5.2  | -1.3      | 97.7±5.0  | 96.9±2.2  |
|            |           | 500.0 | 480.6 | 5.6  | -3.9  | 484.3 | 4.9  | -3.1      | 95.1±4.5  | 97.1±5.4  |
|            | Brain     | 62.5  | 62.6  | 1.9  | 0.2   | 63.3  | 3.2  | 1.3       | 101.9±3.4 | 97.7±5.1  |
|            |           | 250.0 | 243.6 | 4.3  | -2.5  | 246.4 | 5.5  | -1.5      | 99.1±5.6  | 100.1±4.0 |
|            |           | 500.0 | 477.1 | 5.7  | -4.6  | 485.6 | 5.0  | -2.9      | 98.0±4.4  | 95.2±5.4  |
|            | Plasma    | 62.5  | 60.9  | 5.8  | -2.5  | 61.7  | 4.6  | -1.3      | 96.9±3.5  | 93.4±4.1  |
|            |           | 250.0 | 255.5 | 2.6  | 2.2   | 256.3 | 2.3  | 2.5       | 101.5±1.8 | 96.9±2.3  |
|            |           | 500.0 | 478.2 | 2.2  | -4.4  | 488.4 | 3.3  | -2.3      | 97.9±3.6  | 99.6±3.9  |
|            | Heart     | 62.5  | 60.6  | 6.3  | -3.0  | 61.5  | 5.0  | -1.7      | 98.0±5.1  | 92.9±4.4  |
|            |           | 250.0 | 257.5 | 3.8  | 3.0   | 257.6 | 3.1  | 3.0       | 102.9±2.9 | 94.9±2.8  |
|            |           | 500.0 | 472.9 | 3.2  | -5.4  | 487.7 | 4.2  | -2.5      | 94.1±2.7  | 98.4±4.5  |
|            | Liver     | 62.5  | 60.3  | 5.5  | -3.6  | 61.8  | 4.6  | -1.1      | 98.3±3.2  | 95.4±4.5  |
|            |           | 250.0 | 254.8 | 2.2  | 1.9   | 256.4 | 2.5  | 2.6       | 101.9±1.7 | 97.8±2.8  |
|            |           | 500.0 | 484.9 | 2.8  | -3.0  | 491.7 | 3.2  | -1.7      | 98.9±3.0  | 100.6±3.8 |
|            | Spleen    | 62.5  | 60.6  | 6.4  | -3.0  | 61.7  | 5.1  | -1.3      | 99.2±4.0  | 98.3±4.1  |
|            |           | 250.0 | 254.5 | 3.1  | 1.8   | 257.1 | 2.4  | 2.8       | 103.3±2.0 | 93.9±3.8  |
|            |           | 500.0 | 481.6 | 3.3  | -3.7  | 490.6 | 3.7  | -1.9      | 99.0±3.5  | 97.9±2.0  |
|            | Lung      | 62.5  | 60.6  | 6.4  | -3.0  | 61.0  | 5.9  | -2.4      | 96.7±5.7  | 96.9±3.5  |
|            |           | 250.0 | 256.8 | 3.4  | 2.7   | 257.2 | 2.9  | 2.9       | 102.6±2.5 | 91.7±4.9  |
|            |           | 500.0 | 481.6 | 3.3  | -3.7  | 488.4 | 3.4  | -2.3      | 97.9±3.0  | 95.2±1.9  |
|            | Kidney    | 62.5  | 60.3  | 7.0  | -3.6  | 61.1  | 5.8  | -2.2      | 98.0±5.2  | 98.5±3.5  |
|            |           | 250.0 | 254.6 | 3.1  | 1.8   | 255.6 | 2.7  | 2.3       | 102.4±2.6 | 93.5±6.3  |
|            |           | 500.0 | 479.5 | 2.6  | -4.1  | 487.7 | 3.5  | -2.5      | 96.9±2.9  | 97.2±2.9  |
| Stomach    | 62.5      | 60.6  | 6.4   | -3.1 | 61.4  | 5.2   | -1.8 | 100.0±4.8 | 97.7±4.0  |           |
|            | 250.0     | 254.7 | 3.0   | 1.9  | 255.7 | 2.7   | 2.3  | 102.9±2.7 | 94.3±5.4  |           |

|           |           |       |       |      |       |       |      |           |            |            |
|-----------|-----------|-------|-------|------|-------|-------|------|-----------|------------|------------|
| 8-shogaol | Intestine | 500.0 | 477.2 | 3.9  | -4.6  | 488.2 | 3.8  | -2.4      | 99.3±2.9   | 97.0±3.0   |
|           |           | 62.5  | 60.1  | 7.3  | -3.8  | 61.3  | 5.5  | -2.0      | 98.7±4.5   | 97.9±4.3   |
|           |           | 250.0 | 255.8 | 2.8  | 2.3   | 256.1 | 2.6  | 2.4       | 102.8±2.5  | 94.2±5.7   |
|           | Brain     | 500.0 | 473.9 | 4.4  | -5.2  | 485.9 | 4.2  | -2.8      | 98.4±3.2   | 97.3±2.4   |
|           |           | 62.5  | 60.4  | 6.8  | -3.4  | 61.3  | 5.5  | -2.0      | 98.7±4.8   | 96.3±3.4   |
|           |           | 250.0 | 255.7 | 3.5  | 2.3   | 256.2 | 2.5  | 2.5       | 102.6±2.1  | 95.4±4.4   |
|           | Plasma    | 500.0 | 477.0 | 5.6  | -4.6  | 486.7 | 4.4  | -2.7      | 98.3±3.5   | 96.9±1.9   |
|           |           | 15.6  | 15.9  | 11.4 | 1.5   | 15.8  | 9.5  | 1.1       | 102.3±8.2  | 112.7±9.6  |
|           |           | 125.0 | 118.3 | 7.8  | -5.4  | 121.3 | 5.8  | -3.0      | 95.5±4.6   | 93.3±5.7   |
|           | Heart     | 250.0 | 259.0 | 5.4  | 3.6   | 259.4 | 4.4  | 3.7       | 104.2±4.5  | 99.4±4.7   |
|           |           | 15.6  | 15.5  | 8.3  | -0.7  | 15.8  | 9.9  | 1.1       | 101.4±9.5  | 111.7±8.3  |
|           |           | 125.0 | 117.9 | 7.3  | -5.7  | 121.0 | 5.6  | -3.2      | 95.9±5.2   | 93.6±5.9   |
|           | Liver     | 250.0 | 257.4 | 4.7  | 2.9   | 258.6 | 4.2  | 3.4       | 103.5±4.0  | 98.9±4.7   |
|           |           | 15.6  | 16.2  | 11.3 | 3.6   | 16.0  | 9.2  | 2.5       | 105.6±8.2  | 111.5±8.3  |
|           |           | 125.0 | 121.6 | 7.5  | -2.7  | 123.5 | 5.5  | -1.2      | 98.8±3.9   | 95.9±5.7   |
|           | Spleen    | 250.0 | 256.7 | 4.4  | 2.7   | 257.5 | 3.7  | 3.0       | 101.7±3.8  | 98.3±3.8   |
|           |           | 15.6  | 16.5  | 12.2 | 5.8   | 16.1  | 10.0 | 3.3       | 102.0±9.0  | 112.9±10.0 |
|           |           | 125.0 | 121.6 | 5.7  | -2.7  | 123.5 | 4.4  | -1.2      | 99.8±3.8   | 95.2±4.8   |
|           | Lung      | 250.0 | 256.7 | 4.4  | 2.7   | 257.9 | 4.5  | 3.2       | 103.4±4.7  | 97.3±5.3   |
|           |           | 15.6  | 16.2  | 8.7  | 3.6   | 16.0  | 8.8  | 2.3       | 103.1±8.3  | 105.9±9.3  |
|           |           | 125.0 | 120.6 | 6.0  | -3.5  | 121.8 | 4.9  | -2.5      | 96.3±4.3   | 93.0±3.8   |
|           | Kidney    | 250.0 | 258.4 | 5.3  | 3.3   | 258.9 | 4.3  | 3.6       | 103.3±4.4  | 99.6±4.8   |
|           |           | 15.6  | 16.2  | 14.2 | 3.4   | 16.0  | 10.0 | 2.3       | 102.9±9.9  | 113.6±11.9 |
|           |           | 125.0 | 119.4 | 7.3  | -4.5  | 121.5 | 5.7  | -2.8      | 97.9±5.5   | 93.1±5.8   |
| Stomach   | 250.0     | 259.4 | 5.4   | 3.7  | 259.4 | 4.5   | 3.7  | 103.9±4.2 | 98.4±4.9   |            |
|           | 15.6      | 15.6  | 8.7   | -0.4 | 15.6  | 9.6   | 0.1  | 96.6±8.5  | 107.9±10.1 |            |



|             |           |       |       |      |      |       |      |      |            |            |
|-------------|-----------|-------|-------|------|------|-------|------|------|------------|------------|
|             |           | 125.0 | 119.1 | 7.4  | -4.8 | 121.5 | 6.1  | -2.8 | 100.2±4.2  | 94.4±6.6   |
|             |           | 250.0 | 258.7 | 5.6  | 3.5  | 258.9 | 4.7  | 3.6  | 105.1±3.1  | 100.2±4.3  |
|             | Intestine | 15.6  | 15.4  | 9.0  | -1.5 | 15.5  | 10.0 | -0.6 | 101.1±10.8 | 110.7±11.1 |
|             |           | 125.0 | 119.5 | 6.8  | -4.4 | 121.7 | 5.3  | -2.6 | 97.2±4.7   | 94.9±5.3   |
|             |           | 250.0 | 258.9 | 4.8  | 3.5  | 259.0 | 4.1  | 3.6  | 102.1±4.0  | 98.8±4.0   |
|             | Brain     | 15.6  | 15.5  | 11.1 | -0.6 | 15.8  | 10.1 | 0.8  | 101.6±9.8  | 113.4±12.3 |
|             |           | 125.0 | 118.8 | 8.5  | -5.0 | 121.5 | 6.3  | -2.8 | 98.3±4.9   | 94.0±5.6   |
|             |           | 250.0 | 257.3 | 6.5  | 2.9  | 258.5 | 4.9  | 3.4  | 103.7±4.3  | 96.7±4.9   |
| 10-gingerol | Plasma    | 62.5  | 65.9  | 4.0  | 5.5  | 66.0  | 3.4  | 5.6  | 104.0±2.9  | 95.2±3.2   |
|             |           | 250.0 | 252.7 | 4.1  | 1.1  | 253.0 | 5.1  | 1.2  | 95.9±3.4   | 95.1±4.1   |
|             |           | 500.0 | 484.5 | 2.9  | -3.1 | 504.8 | 3.7  | 1.0  | 98.7±5.8   | 101.5±4.0  |
|             | Heart     | 62.5  | 63.9  | 3.2  | 2.3  | 64.7  | 3.5  | 3.5  | 103.6±3.6  | 104.9±3.7  |
|             |           | 250.0 | 249.7 | 4.1  | -0.1 | 251.4 | 4.8  | 0.5  | 100.7±4.5  | 95.4±5.2   |
|             |           | 500.0 | 481.2 | 2.6  | -3.8 | 503.3 | 3.9  | 0.7  | 100.3±4.2  | 101.1±4.2  |
|             | Liver     | 62.5  | 65.6  | 3.4  | 4.9  | 65.4  | 2.5  | 4.6  | 104.2±1.9  | 96.1±2.3   |
|             |           | 250.0 | 252.7 | 4.1  | 1.1  | 251.6 | 4.4  | 0.6  | 99.4±4.2   | 94.5±2.9   |
|             |           | 500.0 | 487.2 | 3.4  | -2.6 | 504.0 | 3.4  | 0.8  | 102.1±2.1  | 101.2±3.4  |
|             | Spleen    | 62.5  | 64.6  | 2.4  | 3.3  | 65.1  | 2.9  | 4.2  | 104.7±3.0  | 103.1±2.0  |
|             |           | 250.0 | 252.4 | 2.8  | 0.9  | 253.1 | 5.0  | 1.3  | 100.7±4.9  | 102.1±3.1  |
|             |           | 500.0 | 487.2 | 3.4  | -2.6 | 504.6 | 3.5  | 0.9  | 101.6±2.0  | 95.9±4.9   |
|             | Lung      | 62.5  | 64.6  | 5.2  | 3.3  | 65.2  | 3.5  | 4.4  | 104.5±4.1  | 99.0±4.4   |
|             |           | 250.0 | 254.0 | 5.0  | 1.6  | 253.7 | 5.4  | 1.5  | 100.5±5.5  | 94.6±3.5   |
|             |           | 500.0 | 484.5 | 2.9  | -3.1 | 493.9 | 4.0  | -1.2 | 97.2±3.6   | 92.9±4.9   |
|             | Kidney    | 62.5  | 66.2  | 4.7  | 6.0  | 66.2  | 3.7  | 6.0  | 105.8±3.6  | 101.7±4.5  |
|             |           | 250.0 | 252.2 | 4.3  | 0.9  | 252.4 | 5.4  | 1.0  | 102.2±3.8  | 95.6±3.7   |
|             |           | 500.0 | 482.3 | 2.6  | -3.5 | 503.7 | 3.8  | 0.7  | 99.8±3.8   | 94.7±6.0   |

|            |           |       |       |      |       |       |      |          |           |           |
|------------|-----------|-------|-------|------|-------|-------|------|----------|-----------|-----------|
| 10-shogaol | Stomach   | 62.5  | 65.5  | 3.3  | 4.9   | 65.9  | 3.3  | 5.4      | 105.7±3.5 | 101.5±5.0 |
|            |           | 250.0 | 253.4 | 4.5  | 1.4   | 253.0 | 5.3  | 1.2      | 103.4±4.5 | 97.7±3.9  |
|            |           | 500.0 | 482.0 | 4.2  | -3.6  | 503.6 | 4.2  | 0.7      | 102.1±2.5 | 94.9±5.8  |
|            | Intestine | 62.5  | 66.6  | 4.6  | 6.6   | 66.0  | 3.3  | 5.6      | 106.1±3.0 | 102.1±5.1 |
|            |           | 250.0 | 252.0 | 4.4  | 0.8   | 252.6 | 5.3  | 1.0      | 100.0±5.4 | 96.4±3.2  |
|            |           | 500.0 | 481.5 | 4.0  | -3.7  | 502.4 | 4.4  | 0.5      | 101.0±3.1 | 96.8±4.4  |
|            | Brain     | 62.5  | 65.6  | 5.0  | 4.9   | 65.6  | 4.6  | 4.9      | 104.9±4.7 | 103.8±2.6 |
|            |           | 250.0 | 251.6 | 4.6  | 0.7   | 252.4 | 5.4  | 1.0      | 101.1±5.7 | 97.4±2.6  |
|            |           | 500.0 | 481.1 | 4.5  | -3.8  | 504.0 | 4.4  | 0.8      | 103.1±2.0 | 95.8±5.7  |
|            | Plasma    | 15.6  | 14.9  | 3.0  | -4.9  | 15.2  | 6.7  | -2.7     | 93.7±2.9  | 97.9±6.0  |
|            |           | 125.0 | 118.3 | 2.0  | -5.4  | 118.8 | 5.0  | -5.0     | 90.2±4.3  | 97.9±5.5  |
|            |           | 250.0 | 245.4 | 1.5  | -1.8  | 247.5 | 3.9  | -1.0     | 98.4±1.7  | 99.9±4.1  |
|            | Heart     | 15.6  | 15.2  | 3.3  | -2.8  | 15.4  | 7.8  | -1.3     | 98.5±7.4  | 102.5±8.6 |
|            |           | 125.0 | 121.6 | 5.6  | -2.7  | 121.0 | 5.9  | -3.2     | 96.9±6.0  | 100.8±7.2 |
|            |           | 250.0 | 245.1 | 1.7  | -2.0  | 247.0 | 4.1  | -1.2     | 99.4±4.1  | 99.0±4.9  |
|            | Liver     | 15.6  | 14.5  | 6.2  | -7.0  | 15.2  | 7.5  | -2.7     | 97.2±6.0  | 97.9±7.4  |
|            |           | 125.0 | 119.6 | 3.1  | -4.3  | 120.1 | 4.2  | -3.9     | 95.4±3.0  | 99.5±4.8  |
|            |           | 250.0 | 247.1 | 2.5  | -1.2  | 247.0 | 3.1  | -1.2     | 97.9±2.4  | 97.3±2.5  |
|            | Spleen    | 15.6  | 15.3  | 6.1  | -1.9  | 15.1  | 6.0  | -3.2     | 98.5±5.8  | 92.2±5.5  |
|            |           | 125.0 | 118.6 | 6.5  | -5.1  | 119.5 | 5.3  | -4.4     | 96.0±4.6  | 94.1±4.4  |
|            |           | 250.0 | 243.1 | 3.1  | -2.8  | 246.5 | 4.0  | -1.4     | 99.0±4.0  | 99.3±4.4  |
|            | Lung      | 15.6  | 15.5  | 10.7 | -0.8  | 15.5  | 9.2  | -0.7     | 99.3±7.9  | 86.3±6.1  |
|            |           | 125.0 | 116.9 | 3.9  | -6.5  | 118.1 | 5.6  | -5.5     | 93.6±4.6  | 96.6±5.1  |
|            |           | 250.0 | 243.4 | 2.9  | -2.6  | 247.1 | 4.1  | -1.2     | 97.6±2.6  | 98.0±2.8  |
| Kidney     | 15.6      | 14.6  | 5.1   | -6.4 | 15.2  | 7.7   | -3.0 | 95.8±6.8 | 100.0±9.0 |           |
|            | 125.0     | 117.5 | 3.0   | -6.0 | 118.5 | 4.9   | -5.2 | 95.1±3.8 | 99.0±5.8  |           |

|           |           |       |       |      |       |       |      |           |           |           |
|-----------|-----------|-------|-------|------|-------|-------|------|-----------|-----------|-----------|
| Zingerone | Stomach   | 250.0 | 244.8 | 1.9  | -2.1  | 247.1 | 4.1  | -1.2      | 99.6±3.8  | 99.4±5.1  |
|           |           | 15.6  | 14.6  | 5.4  | -6.5  | 15.0  | 8.7  | -4.2      | 95.4±7.6  | 97.6±10.5 |
|           |           | 125.0 | 118.6 | 4.9  | -5.1  | 118.7 | 5.7  | -5.0      | 95.9±5.8  | 95.1±6.5  |
|           | Intestine | 250.0 | 243.1 | 3.1  | -2.8  | 246.4 | 4.2  | -1.5      | 100.3±3.3 | 99.2±5.2  |
|           |           | 15.6  | 14.6  | 5.1  | -6.4  | 15.1  | 7.7  | -3.6      | 100.0±5.8 | 95.0±7.2  |
|           |           | 125.0 | 118.9 | 5.3  | -4.9  | 118.9 | 5.7  | -4.9      | 95.6±5.3  | 95.8±5.3  |
|           | Brain     | 250.0 | 243.4 | 2.9  | -2.6  | 246.5 | 4.4  | -1.4      | 98.7±4.5  | 100.1±4.6 |
|           |           | 15.6  | 15.0  | 9.2  | -4.2  | 15.3  | 8.6  | -2.1      | 99.0±8.0  | 92.0±9.2  |
|           |           | 125.0 | 117.5 | 3.2  | -6.0  | 118.7 | 5.4  | -5.1      | 95.4±5.7  | 100.5±5.2 |
|           | Plasma    | 250.0 | 244.4 | 2.2  | -2.2  | 246.7 | 4.4  | -1.3      | 99.1±4.8  | 99.8±5.2  |
|           |           | 62.5  | 63.6  | 5.9  | 1.8   | 64.4  | 5.1  | 3.0       | 103.5±4.3 | 108.0±4.5 |
|           |           | 250.0 | 244.1 | 1.8  | -2.4  | 245.6 | 1.2  | -1.8      | 98.1±1.1  | 99.3±1.4  |
|           | Heart     | 500.0 | 484.2 | 2.8  | -3.2  | 487.6 | 4.0  | -2.5      | 97.7±4.5  | 100.2±4.8 |
|           |           | 62.5  | 64.3  | 4.5  | 2.8   | 64.5  | 4.4  | 3.2       | 103.1±4.5 | 104.2±3.9 |
|           |           | 250.0 | 241.8 | 3.5  | -3.3  | 244.0 | 2.4  | -2.4      | 97.8±2.3  | 98.0±2.8  |
|           | Liver     | 500.0 | 486.2 | 3.3  | -2.8  | 489.4 | 3.8  | -2.1      | 97.1±3.1  | 101.1±4.0 |
|           |           | 62.5  | 63.9  | 5.1  | 2.3   | 64.4  | 4.6  | 3.0       | 104.7±4.5 | 106.2±4.4 |
|           |           | 250.0 | 245.4 | 2.5  | -1.8  | 244.9 | 1.9  | -2.1      | 97.2±1.6  | 97.0±1.9  |
|           | Spleen    | 500.0 | 487.5 | 3.7  | -2.5  | 489.6 | 4.4  | -2.1      | 97.4±4.8  | 100.8±5.2 |
|           |           | 62.5  | 63.3  | 6.1  | 1.2   | 64.1  | 5.0  | 2.6       | 103.0±5.0 | 99.8±5.1  |
| 250.0     |           | 245.1 | 1.1   | -2.0 | 246.6 | 1.5   | -1.4 | 98.9±1.5  | 109.2±4.7 |           |
| Lung      | 500.0     | 486.6 | 3.4   | -2.7 | 488.8 | 4.2   | -2.2 | 98.5±4.2  | 99.6±1.9  |           |
|           | 62.5      | 63.4  | 6.0   | 1.5  | 64.2  | 5.2   | 2.7  | 102.1±5.2 | 100.4±4.5 |           |
|           | 250.0     | 244.4 | 2.0   | -2.2 | 245.6 | 1.2   | -1.8 | 97.8±1.2  | 107.2±5.1 |           |
| Kidney    | 500.0     | 486.2 | 3.3   | -2.8 | 487.7 | 4.2   | -2.5 | 97.3±3.1  | 98.4±1.2  |           |
|           | 62.5      | 63.3  | 6.1   | 1.2  | 64.5  | 5.1   | 3.2  | 103.2±4.8 | 101.2±4.0 |           |

|              |           |       |       |     |      |       |     |      |           |           |
|--------------|-----------|-------|-------|-----|------|-------|-----|------|-----------|-----------|
|              |           | 250.0 | 242.4 | 3.0 | -3.0 | 244.8 | 1.9 | -2.1 | 98.0±2.0  | 107.7±5.0 |
|              |           | 500.0 | 480.8 | 4.8 | -3.8 | 485.8 | 4.5 | -2.8 | 96.9±4.5  | 98.6±2.2  |
|              | Stomach   | 62.5  | 63.1  | 5.8 | 0.9  | 64.1  | 5.1 | 2.6  | 100.9±4.6 | 101.3±3.7 |
|              |           | 250.0 | 243.2 | 3.3 | -2.7 | 244.8 | 2.1 | -2.1 | 99.0±0.5  | 107.5±4.5 |
|              |           | 500.0 | 482.6 | 4.4 | -3.5 | 486.0 | 4.7 | -2.8 | 95.6±3.7  | 98.4±1.5  |
|              | Intestine | 62.5  | 63.9  | 6.5 | 2.2  | 64.4  | 5.5 | 3.0  | 104.5±5.7 | 97.2±5.2  |
|              |           | 250.0 | 243.0 | 3.0 | -2.8 | 245.3 | 1.8 | -1.9 | 97.8±2.0  | 107.3±5.7 |
|              |           | 500.0 | 480.9 | 5.1 | -3.8 | 486.5 | 4.8 | -2.7 | 96.2±4.3  | 98.7±2.2  |
|              | Brain     | 62.5  | 63.8  | 7.0 | 2.1  | 64.1  | 5.9 | 2.6  | 102.9±5.6 | 97.6±5.5  |
|              |           | 250.0 | 240.8 | 5.0 | -3.7 | 243.9 | 3.0 | -2.5 | 98.2±1.5  | 109.1±7.0 |
|              |           | 500.0 | 482.0 | 5.7 | -3.6 | 486.4 | 5.3 | -2.7 | 97.7±5.0  | 97.2±3.5  |
| 6-isodehy    | Plasma    | 15.6  | 14.6  | 5.2 | -6.5 | 14.8  | 5.2 | -5.1 | 93.5±4.5  | 95.5±5.8  |
| drogingenone |           | 125.0 | 120.3 | 5.7 | -3.8 | 123.1 | 4.9 | -1.6 | 98.1±4.6  | 100.3±5.8 |
|              |           | 250.0 | 242.8 | 2.6 | -2.9 | 245.1 | 2.5 | -2.0 | 95.2±4.5  | 97.2±2.3  |
|              | Heart     | 15.6  | 14.6  | 5.2 | -6.5 | 14.8  | 5.2 | -5.1 | 94.3±3.9  | 94.4±4.9  |
|              |           | 125.0 | 121.3 | 4.3 | -3.0 | 123.1 | 4.3 | -1.6 | 97.1±3.8  | 98.6±4.8  |
|              |           | 250.0 | 246.2 | 2.6 | -1.5 | 245.8 | 2.5 | -1.7 | 97.3±2.1  | 96.7±2.3  |
|              | Liver     | 15.6  | 14.9  | 6.3 | -4.4 | 14.8  | 6.8 | -5.1 | 94.3±6.2  | 95.5±7.9  |
|              |           | 125.0 | 121.3 | 6.6 | -3.0 | 123.7 | 5.3 | -1.0 | 97.5±5.3  | 101.1±6.2 |
|              |           | 250.0 | 244.2 | 3.5 | -2.3 | 246.1 | 3.0 | -1.6 | 97.5±1.9  | 96.0±3.0  |
|              | Spleen    | 15.6  | 14.9  | 8.7 | -4.4 | 15.1  | 7.2 | -3.6 | 97.8±7.1  | 91.5±6.7  |
|              |           | 125.0 | 122.3 | 2.8 | -2.2 | 122.8 | 3.8 | -1.7 | 98.5±4.0  | 98.9±4.7  |
|              |           | 250.0 | 244.5 | 3.8 | -2.2 | 246.2 | 3.1 | -1.5 | 98.9±2.9  | 95.9±2.8  |
|              | Lung      | 15.6  | 14.3  | 9.1 | -8.7 | 14.6  | 7.1 | -6.5 | 91.4±5.9  | 91.7±5.7  |
|              |           | 125.0 | 121.6 | 3.8 | -2.7 | 122.4 | 4.1 | -2.1 | 97.8±3.3  | 98.2±3.8  |
|              |           | 250.0 | 240.8 | 3.6 | -3.7 | 243.9 | 3.0 | -2.4 | 97.1±2.9  | 96.4±2.8  |

|           |       |       |      |      |       |     |      |           |           |
|-----------|-------|-------|------|------|-------|-----|------|-----------|-----------|
| Kidney    | 15.6  | 14.3  | 8.3  | -8.3 | 14.8  | 8.6 | -5.6 | 95.9±7.7  | 94.7±9.8  |
|           | 125.0 | 120.8 | 5.4  | -3.4 | 122.5 | 4.4 | -2.0 | 98.2±4.4  | 99.3±5.2  |
|           | 250.0 | 243.8 | 3.2  | -2.5 | 245.5 | 2.7 | -1.8 | 98.0±2.5  | 97.0±2.9  |
| Stomach   | 15.6  | 14.5  | 10.8 | -7.4 | 14.5  | 7.8 | -7.0 | 94.6±7.0  | 88.1±6.8  |
|           | 125.0 | 120.4 | 6.4  | -3.7 | 123.1 | 4.8 | -1.5 | 100.2±3.2 | 100.4±3.8 |
|           | 250.0 | 242.6 | 3.5  | -3.0 | 245.2 | 2.9 | -1.9 | 99.2±2.5  | 97.2±3.1  |
| Intestine | 15.6  | 14.7  | 10.1 | -6.0 | 14.9  | 7.0 | -4.6 | 97.3±5.8  | 91.9±6.7  |
|           | 125.0 | 119.9 | 7.4  | -4.1 | 122.7 | 5.4 | -1.8 | 98.2±5.9  | 99.5±6.3  |
|           | 250.0 | 242.0 | 3.0  | -3.2 | 244.6 | 2.6 | -2.2 | 98.0±2.1  | 97.9±3.0  |
| Brain     | 15.6  | 15.1  | 10.4 | -3.4 | 14.9  | 8.5 | -4.9 | 94.4±7.1  | 89.4±3.9  |
|           | 125.0 | 120.3 | 7.2  | -3.7 | 122.8 | 5.2 | -1.8 | 99.2±4.1  | 98.4±6.2  |
|           | 250.0 | 242.6 | 4.9  | -3.0 | 244.7 | 3.3 | -2.1 | 98.3±2.4  | 96.2±2.5  |

---

Table S3: Stability of eight analytes in rat plasma and tissues under various conditions (n = 6).

| Analytes   | Plasma/tissues | C <sub>nom</sub><br>(ng/mL) | 4 °C for 24 h            |          | Three freeze-thaw cycles |          | Frozen at -20°C for 30 days |          |
|------------|----------------|-----------------------------|--------------------------|----------|--------------------------|----------|-----------------------------|----------|
|            |                |                             | C <sub>obs</sub> (ng/mL) | R.E. (%) | C <sub>obs</sub> (ng/mL) | R.E. (%) | C <sub>obs</sub> (ng/mL)    | R.E. (%) |
| 6-gingerol | Plasma         | 62.5                        | 66.7                     | 6.7      | 68.1                     | 8.9      | 68.2                        | 9.2      |
|            |                | 250.0                       | 242.7                    | -2.9     | 246.1                    | -1.6     | 245.9                       | -1.6     |
|            |                | 500.0                       | 490.8                    | -1.9     | 485.7                    | -2.9     | 484.6                       | -3.1     |
|            | Heart          | 62.5                        | 67.1                     | 7.3      | 69.2                     | 10.7     | 68.8                        | 10.1     |
|            |                | 250.0                       | 244.8                    | -2.1     | 247.1                    | -1.2     | 247.7                       | -0.9     |
|            |                | 500.0                       | 483.1                    | -3.4     | 484.7                    | -3.1     | 476.1                       | -4.8     |
|            | Liver          | 62.5                        | 66.0                     | 5.6      | 68.8                     | 10.0     | 68.7                        | 10.0     |
|            |                | 250.0                       | 244.6                    | -2.2     | 248.7                    | -0.5     | 248.2                       | -0.7     |
|            |                | 500.0                       | 482.8                    | -3.5     | 483.3                    | -3.3     | 484.3                       | -3.1     |
|            | Spleen         | 62.5                        | 66.4                     | 6.2      | 67.4                     | 7.9      | 67.9                        | 8.7      |
|            |                | 250.0                       | 246.0                    | -1.6     | 249.3                    | -0.3     | 248.9                       | -0.5     |
|            |                | 500.0                       | 474.7                    | -5.1     | 478.3                    | -4.4     | 476.1                       | -4.8     |
|            | Lung           | 62.5                        | 65.7                     | 5.1      | 67.0                     | 7.2      | 66.6                        | 6.6      |
|            |                | 250.0                       | 244.3                    | -2.3     | 247.3                    | -1.1     | 246.4                       | -1.4     |
|            |                | 500.0                       | 487.3                    | -2.5     | 490.3                    | -1.9     | 485.2                       | -3.0     |
|            | Kidney         | 62.5                        | 66.9                     | 7.0      | 69.5                     | 11.2     | 69.5                        | 11.2     |
|            |                | 250.0                       | 247.7                    | -0.9     | 249.8                    | -0.1     | 248.3                       | -0.7     |
|            |                | 500.0                       | 491.5                    | -1.7     | 487.1                    | -2.6     | 491.0                       | -1.8     |
|            | Stomach        | 62.5                        | 67.0                     | 7.1      | 69.0                     | 10.4     | 68.7                        | 9.8      |
|            |                | 250.0                       | 247.1                    | -1.2     | 247.3                    | -1.1     | 246.7                       | -1.3     |
|            |                | 500.0                       | 473.6                    | -5.3     | 476.1                    | -4.8     | 474.5                       | -5.1     |
|            | Intestine      | 62.5                        | 67.5                     | 8.0      | 69.5                     | 11.3     | 68.8                        | 10.1     |

|           |         |       |       |      |       |      |       |      |
|-----------|---------|-------|-------|------|-------|------|-------|------|
| 6-shogaol | Brain   | 250.0 | 245.4 | -1.9 | 250.0 | 0.0  | 249.6 | -0.2 |
|           |         | 500.0 | 483.6 | -3.3 | 477.5 | -4.5 | 475.4 | -4.9 |
|           |         | 62.5  | 67.4  | 7.8  | 69.4  | 11.1 | 69.4  | 11.1 |
|           | Plasma  | 250.0 | 244.5 | -2.2 | 247.9 | -0.8 | 248.6 | -0.6 |
|           |         | 500.0 | 490.4 | -1.9 | 488.0 | -2.4 | 492.0 | -1.6 |
|           |         | 62.5  | 62.9  | 0.7  | 64.0  | 2.4  | 64.2  | 2.7  |
|           | Heart   | 250.0 | 244.5 | -2.2 | 250.1 | 0.0  | 250.6 | 0.2  |
|           |         | 500.0 | 485.4 | -2.9 | 485.7 | -2.9 | 484.0 | -3.2 |
|           |         | 62.5  | 62.7  | 0.3  | 63.8  | 2.1  | 63.5  | 1.6  |
|           | Liver   | 250.0 | 245.4 | -1.8 | 249.8 | -0.1 | 249.8 | -0.1 |
|           |         | 500.0 | 480.6 | -3.9 | 476.1 | -4.8 | 478.3 | -4.3 |
|           |         | 62.5  | 63.2  | 1.1  | 64.7  | 3.5  | 64.3  | 2.9  |
|           | Spleen  | 250.0 | 247.8 | -0.9 | 253.4 | 1.4  | 254.5 | 1.8  |
|           |         | 500.0 | 488.2 | -2.4 | 485.3 | -2.9 | 488.5 | -2.3 |
|           |         | 62.5  | 63.2  | 1.1  | 64.8  | 3.7  | 65.4  | 4.6  |
|           | Lung    | 250.0 | 248.2 | -0.7 | 254.0 | 1.6  | 256.0 | 2.4  |
|           |         | 500.0 | 491.3 | -1.8 | 491.9 | -1.6 | 498.7 | -0.3 |
|           |         | 62.5  | 64.9  | 3.8  | 64.3  | 2.8  | 64.1  | 2.6  |
|           | Kidney  | 250.0 | 249.6 | -0.2 | 250.3 | 0.1  | 249.9 | -0.0 |
|           |         | 500.0 | 483.1 | -3.4 | 483.3 | -3.3 | 483.8 | -3.2 |
|           |         | 62.5  | 63.6  | 1.8  | 64.1  | 2.6  | 64.5  | 3.2  |
|           | Stomach | 250.0 | 245.8 | -1.7 | 252.1 | 0.8  | 252.9 | 1.2  |
|           |         | 500.0 | 487.3 | -2.5 | 485.6 | -2.9 | 481.7 | -3.7 |
|           |         | 62.5  | 63.3  | 1.3  | 63.9  | 2.2  | 64.0  | 2.4  |
|           |         | 250.0 | 249.5 | -0.2 | 249.8 | -0.1 | 250.0 | 0.0  |
|           |         | 500.0 | 483.2 | -3.4 | 487.4 | -2.5 | 485.1 | -3.0 |

|            |           |       |       |       |       |       |       |      |
|------------|-----------|-------|-------|-------|-------|-------|-------|------|
| 8-gingerol | Intestine | 62.5  | 63.7  | 1.9   | 64.9  | 3.8   | 65.5  | 4.7  |
|            |           | 250.0 | 249.9 | -0.0  | 255.7 | 2.3   | 257.7 | 3.1  |
|            |           | 500.0 | 491.7 | -1.7  | 490.9 | -1.8  | 499.8 | -0.0 |
|            | Brain     | 62.5  | 63.2  | 1.1   | 63.8  | 2.1   | 64.5  | 3.2  |
|            |           | 250.0 | 248.6 | -0.6  | 252.0 | 0.8   | 252.9 | 1.2  |
|            |           | 500.0 | 485.7 | -2.9  | 484.3 | -3.1  | 482.1 | -3.6 |
|            | Plasma    | 62.5  | 60.9  | -2.5  | 61.9  | -1.0  | 62.1  | -0.7 |
|            |           | 250.0 | 254.2 | 1.7   | 257.0 | 2.8   | 256.7 | 2.7  |
|            |           | 500.0 | 485.6 | -2.9  | 483.6 | -3.3  | 482.9 | -3.4 |
|            | Heart     | 62.5  | 60.4  | -3.3  | 62.4  | -0.2  | 61.9  | -0.9 |
|            |           | 250.0 | 256.8 | 2.7   | 261.3 | 4.5   | 260.9 | 4.4  |
|            |           | 500.0 | 478.1 | -4.4  | 484.7 | -3.1  | 476.3 | -4.7 |
|            | Liver     | 62.5  | 61.9  | -1.0  | 63.6  | 1.7   | 63.6  | 1.7  |
|            |           | 250.0 | 258.6 | 3.4   | 261.6 | 4.6   | 260.1 | 4.0  |
|            |           | 500.0 | 497.0 | -0.6  | 500.1 | 0.0   | 495.1 | -1.0 |
|            | Spleen    | 62.5  | 61.9  | -1.0  | 64.0  | 2.4   | 63.8  | 2.1  |
|            |           | 250.0 | 257.9 | 3.2   | 261.5 | 4.6   | 262.3 | 4.9  |
|            |           | 500.0 | 487.4 | -2.5  | 489.8 | -2.1  | 488.1 | -2.4 |
|            | Lung      | 62.5  | 60.7  | -2.9  | 62.2  | -0.5  | 61.9  | -1.0 |
|            |           | 250.0 | 255.6 | 2.3   | 258.6 | 3.4   | 258.3 | 3.3  |
|            |           | 500.0 | 484.9 | -3.0  | 492.3 | -1.5  | 486.6 | -2.7 |
|            | Kidney    | 62.5  | 60.5  | -3.3  | 61.9  | -1.0  | 62.5  | -0.0 |
|            |           | 250.0 | 254.1 | 1.6   | 256.7 | 2.7   | 258.3 | 3.3  |
|            |           | 500.0 | 490.3 | -1.9  | 489.8 | -2.0  | 496.4 | -0.7 |
| Stomach    | 62.5      | 61.8  | -1.1  | 62.5  | 0.1   | 62.3  | -0.4  |      |
|            | 250.0     | 257.6 | 3.0   | 258.0 | 3.2   | 257.7 | 3.1   |      |



|           |           |       |       |       |       |       |       |      |
|-----------|-----------|-------|-------|-------|-------|-------|-------|------|
| 8-shogaol | Intestine | 500.0 | 482.8 | -3.4  | 486.9 | -2.6  | 486.2 | -2.8 |
|           |           | 62.5  | 62.1  | -0.7  | 63.7  | 1.9   | 63.5  | 1.6  |
|           |           | 250.0 | 255.9 | 2.3   | 260.0 | 4.0   | 259.1 | 3.6  |
|           | Brain     | 500.0 | 491.9 | -1.6  | 486.9 | -2.6  | 487.0 | -2.6 |
|           |           | 62.5  | 60.6  | -3.0  | 62.5  | 0.1   | 62.6  | 0.1  |
|           |           | 250.0 | 254.7 | 1.9   | 258.0 | 3.2   | 258.1 | 3.3  |
|           | Plasma    | 500.0 | 489.3 | -2.2  | 486.4 | -2.7  | 493.3 | -1.3 |
|           |           | 15.6  | 15.7  | 0.2   | 15.4  | -1.3  | 15.6  | 0.0  |
|           |           | 125.0 | 118.0 | -5.6  | 120.6 | -3.5  | 120.5 | -3.6 |
|           | Heart     | 250.0 | 257.5 | 3.0   | 257.6 | 3.1   | 257.6 | 3.0  |
|           |           | 15.6  | 15.4  | -1.7  | 15.7  | 0.2   | 15.4  | -1.7 |
|           |           | 125.0 | 120.9 | -3.3  | 122.3 | -2.2  | 121.6 | -2.7 |
|           | Liver     | 250.0 | 255.6 | 2.2   | 258.2 | 3.3   | 257.7 | 3.1  |
|           |           | 15.6  | 15.7  | 0.5   | 15.8  | 1.1   | 16.3  | 4.4  |
|           |           | 125.0 | 125.7 | 0.6   | 125.1 | 0.0   | 122.9 | -1.7 |
|           | Spleen    | 250.0 | 254.7 | 1.9   | 258.2 | 3.3   | 257.7 | 3.1  |
|           |           | 15.6  | 15.2  | -2.7  | 15.0  | -4.1  | 14.6  | -6.7 |
|           |           | 125.0 | 123.4 | -1.3  | 127.5 | 2.0   | 127.7 | 2.2  |
|           | Lung      | 250.0 | 260.1 | 4.0   | 260.8 | 4.3   | 264.8 | 5.9  |
|           |           | 15.6  | 15.8  | 0.8   | 15.8  | 0.9   | 15.8  | 1.1  |
|           |           | 125.0 | 121.5 | -2.8  | 121.8 | -2.6  | 121.7 | -2.7 |
|           | Kidney    | 250.0 | 257.8 | 3.1   | 256.8 | 2.7   | 257.3 | 2.9  |
|           |           | 15.6  | 16.1  | 3.1   | 15.9  | 1.7   | 15.9  | 1.6  |
|           |           | 125.0 | 121.2 | -3.1  | 121.4 | -2.9  | 122.2 | -2.3 |
| Stomach   | 250.0     | 258.4 | 3.4   | 258.4 | 3.4   | 259.1 | 3.6   |      |
|           | 15.6      | 15.3  | -2.1  | 15.6  | -0.4  | 15.4  | -1.2  |      |

|             |           |       |       |      |       |      |       |      |
|-------------|-----------|-------|-------|------|-------|------|-------|------|
| 10-gingerol | Intestine | 125.0 | 124.0 | -0.8 | 123.3 | -1.4 | 123.9 | -0.9 |
|             |           | 250.0 | 256.6 | 2.6  | 256.5 | 2.6  | 256.8 | 2.7  |
|             |           | 15.6  | 15.2  | -2.8 | 14.8  | -5.5 | 14.4  | -8.1 |
|             | Brain     | 125.0 | 123.4 | -1.3 | 125.9 | 0.7  | 127.7 | 2.2  |
|             |           | 250.0 | 260.7 | 4.3  | 260.6 | 4.2  | 264.7 | 5.9  |
|             |           | 15.6  | 16.1  | 3.3  | 15.7  | 0.5  | 15.6  | -0.3 |
|             | Plasma    | 125.0 | 118.4 | -5.3 | 121.4 | -2.9 | 122.2 | -2.3 |
|             |           | 250.0 | 258.8 | 3.5  | 258.2 | 3.3  | 258.3 | 3.3  |
|             |           | 62.5  | 65.0  | 4.0  | 66.5  | 6.4  | 66.8  | 6.8  |
|             | Heart     | 250.0 | 248.4 | -0.6 | 255.1 | 2.0  | 256.9 | 2.8  |
|             |           | 500.0 | 496.9 | -0.6 | 502.8 | 0.6  | 498.0 | -0.4 |
|             |           | 62.5  | 63.7  | 1.9  | 64.4  | 3.0  | 65.9  | 5.5  |
|             | Liver     | 250.0 | 252.2 | 0.9  | 256.5 | 2.6  | 255.1 | 2.0  |
|             |           | 500.0 | 500.5 | 0.1  | 500.6 | 0.1  | 494.0 | -1.2 |
|             |           | 62.5  | 65.2  | 4.4  | 65.6  | 5.0  | 66.0  | 5.5  |
|             | Spleen    | 250.0 | 249.8 | -0.1 | 251.7 | 0.7  | 249.3 | -0.3 |
|             |           | 500.0 | 509.0 | 1.8  | 509.3 | 1.9  | 508.1 | 1.6  |
|             |           | 62.5  | 63.3  | 1.3  | 65.5  | 4.8  | 65.1  | 4.2  |
|             | Lung      | 250.0 | 252.3 | 0.9  | 260.7 | 4.3  | 264.4 | 5.8  |
|             |           | 500.0 | 507.4 | 1.5  | 515.1 | 3.0  | 513.1 | 2.6  |
|             |           | 62.5  | 64.2  | 2.7  | 65.9  | 5.4  | 65.4  | 4.7  |
|             | Kidney    | 250.0 | 254.1 | 1.7  | 258.8 | 3.5  | 258.2 | 3.3  |
|             |           | 500.0 | 487.7 | -2.5 | 483.4 | -3.3 | 480.1 | -4.0 |
|             |           | 62.5  | 65.6  | 5.0  | 66.9  | 7.0  | 66.4  | 6.3  |
|             |           | 250.0 | 250.2 | 0.1  | 255.7 | 2.3  | 258.1 | 3.2  |
|             |           | 500.0 | 506.1 | 1.2  | 512.0 | 2.4  | 512.2 | 2.4  |

|            |           |       |       |       |       |       |       |      |
|------------|-----------|-------|-------|-------|-------|-------|-------|------|
| 10-shogaol | Stomach   | 62.5  | 66.5  | 6.4   | 66.9  | 7.0   | 66.8  | 6.9  |
|            |           | 250.0 | 255.1 | 2.0   | 256.5 | 2.6   | 258.7 | 3.5  |
|            |           | 500.0 | 508.0 | 1.6   | 510.2 | 2.0   | 505.5 | 1.1  |
|            | Intestine | 62.5  | 65.4  | 4.7   | 67.1  | 7.3   | 66.7  | 6.7  |
|            |           | 250.0 | 254.3 | 1.7   | 260.4 | 4.2   | 264.4 | 5.8  |
|            |           | 500.0 | 509.2 | 1.8   | 515.1 | 3.0   | 513.1 | 2.6  |
|            | Brain     | 62.5  | 64.3  | 2.9   | 66.6  | 6.5   | 66.2  | 6.0  |
|            |           | 250.0 | 250.0 | 0.0   | 256.3 | 2.5   | 259.0 | 3.6  |
|            |           | 500.0 | 503.8 | 0.8   | 511.5 | 2.3   | 512.1 | 2.4  |
|            | Plasma    | 15.6  | 14.7  | -6.0  | 15.0  | -4.1  | 14.6  | -6.5 |
|            |           | 125.0 | 116.8 | -6.6  | 120.1 | -3.9  | 120.9 | -3.3 |
|            |           | 250.0 | 242.8 | -2.9  | 246.3 | -1.5  | 248.3 | -0.7 |
|            | Heart     | 15.6  | 15.2  | -3.1  | 15.9  | 2.0   | 15.9  | 2.0  |
|            |           | 125.0 | 119.4 | -4.5  | 123.5 | -1.2  | 125.5 | 0.4  |
|            |           | 250.0 | 247.5 | -1.0  | 252.6 | 1.0   | 253.2 | 1.3  |
|            | Liver     | 15.6  | 15.4  | -1.7  | 16.0  | 2.1   | 16.2  | 3.4  |
|            |           | 125.0 | 119.8 | -4.2  | 122.9 | -1.7  | 123.0 | -1.6 |
|            |           | 250.0 | 245.0 | -2.0  | 248.7 | -0.5  | 247.3 | -1.1 |
|            | Spleen    | 15.6  | 14.9  | -4.4  | 15.1  | -3.3  | 15.0  | -4.0 |
|            |           | 125.0 | 119.2 | -4.7  | 123.3 | -1.4  | 122.8 | -1.7 |
|            |           | 250.0 | 247.2 | -1.1  | 248.9 | -0.5  | 251.2 | 0.5  |
|            | Lung      | 15.6  | 14.6  | -6.5  | 14.9  | -4.5  | 15.0  | -4.3 |
|            |           | 125.0 | 116.9 | -6.5  | 119.8 | -4.2  | 120.2 | -3.9 |
|            |           | 250.0 | 244.5 | -2.2  | 246.7 | -1.3  | 247.3 | -1.1 |
| Kidney     | 15.6      | 15.1  | -3.5  | 14.9  | -4.9  | 14.8  | -5.5  |      |
|            | 125.0     | 119.5 | -4.4  | 121.3 | -2.9  | 121.3 | -3.0  |      |

|           |           |       |       |      |       |      |       |      |
|-----------|-----------|-------|-------|------|-------|------|-------|------|
| Zingerone | Stomach   | 250.0 | 244.8 | -2.1 | 248.5 | -0.6 | 250.2 | 0.1  |
|           |           | 15.6  | 14.9  | -4.4 | 14.7  | -5.9 | 14.3  | -8.3 |
|           |           | 125.0 | 122.4 | -2.1 | 121.2 | -3.1 | 121.4 | -2.9 |
|           | Intestine | 250.0 | 248.2 | -0.7 | 247.1 | -1.2 | 249.4 | -0.2 |
|           |           | 15.6  | 15.6  | -0.5 | 15.2  | -2.9 | 14.6  | -6.3 |
|           |           | 125.0 | 120.0 | -4.0 | 123.1 | -1.5 | 122.6 | -1.9 |
|           | Brain     | 250.0 | 249.8 | -0.1 | 250.8 | 0.3  | 253.6 | 1.5  |
|           |           | 15.6  | 15.3  | -2.2 | 15.3  | -2.1 | 14.8  | -5.1 |
|           |           | 125.0 | 118.5 | -5.2 | 121.6 | -2.7 | 121.5 | -2.8 |
|           | Plasma    | 250.0 | 244.7 | -2.1 | 247.9 | -0.9 | 250.0 | 0.0  |
|           |           | 62.5  | 63.8  | 2.1  | 63.7  | 1.9  | 63.5  | 1.6  |
|           |           | 250.0 | 243.1 | -2.8 | 244.1 | -2.4 | 244.3 | -2.3 |
|           | Heart     | 500.0 | 482.5 | -3.5 | 479.3 | -4.1 | 478.8 | -4.3 |
|           |           | 62.5  | 63.5  | 1.5  | 64.4  | 3.0  | 64.2  | 2.7  |
|           |           | 250.0 | 243.3 | -2.7 | 245.0 | -2.0 | 242.6 | -3.0 |
|           | Liver     | 500.0 | 486.9 | -2.6 | 484.6 | -3.1 | 484.4 | -3.1 |
|           |           | 62.5  | 64.0  | 2.4  | 64.4  | 3.0  | 64.2  | 2.7  |
|           |           | 250.0 | 243.8 | -2.5 | 245.0 | -2.0 | 245.9 | -1.6 |
|           | Spleen    | 500.0 | 482.4 | -3.5 | 482.3 | -3.5 | 484.5 | -3.1 |
|           |           | 62.5  | 63.8  | 2.1  | 62.9  | 0.6  | 62.0  | -0.8 |
|           |           | 250.0 | 247.4 | -1.1 | 247.7 | -0.9 | 248.4 | -0.7 |
|           | Lung      | 500.0 | 492.4 | -1.5 | 488.5 | -2.3 | 495.6 | -0.9 |
|           |           | 62.5  | 63.1  | 1.0  | 63.6  | 1.8  | 63.4  | 1.4  |
|           |           | 250.0 | 246.4 | -1.5 | 245.4 | -1.8 | 244.2 | -2.3 |
|           | Kidney    | 500.0 | 482.1 | -3.6 | 476.6 | -4.7 | 478.1 | -4.4 |
|           |           | 62.5  | 64.2  | 2.7  | 64.5  | 3.2  | 64.5  | 3.2  |

|                       |           |       |       |      |       |      |       |      |
|-----------------------|-----------|-------|-------|------|-------|------|-------|------|
|                       |           | 250.0 | 244.9 | -2.0 | 246.2 | -1.5 | 247.1 | -1.1 |
|                       |           | 500.0 | 484.6 | -3.1 | 479.7 | -4.1 | 476.4 | -4.7 |
|                       | Stomach   | 62.5  | 63.1  | 1.0  | 63.5  | 1.6  | 63.1  | 0.9  |
|                       |           | 250.0 | 243.0 | -2.8 | 243.9 | -2.5 | 243.2 | -2.7 |
|                       |           | 500.0 | 484.7 | -3.1 | 483.4 | -3.3 | 480.0 | -4.0 |
|                       | Intestine | 62.5  | 62.6  | 0.1  | 62.6  | 0.1  | 61.7  | -1.3 |
|                       |           | 250.0 | 245.5 | -1.8 | 247.0 | -1.2 | 247.7 | -0.9 |
|                       |           | 500.0 | 497.8 | -0.4 | 489.5 | -2.1 | 496.6 | -0.7 |
|                       | Brain     | 62.5  | 64.7  | 3.6  | 63.9  | 2.2  | 63.9  | 2.2  |
|                       |           | 250.0 | 243.7 | -2.5 | 245.6 | -1.8 | 247.1 | -1.1 |
|                       |           | 500.0 | 486.6 | -2.7 | 479.0 | -4.2 | 474.0 | -5.2 |
| 6-isodehydrogingenone | Plasma    | 15.6  | 14.1  | 0.7  | 14.7  | -5.9 | 14.9  | -4.9 |
|                       |           | 125.0 | 120.2 | -2.2 | 120.8 | -3.3 | 120.1 | -4.0 |
|                       |           | 250.0 | 243.8 | -2.9 | 246.6 | -1.4 | 245.9 | -1.6 |
|                       | Heart     | 15.6  | 14.8  | 0.3  | 15.2  | -2.7 | 15.0  | -3.8 |
|                       |           | 125.0 | 122.8 | -1.8 | 124.8 | -0.1 | 122.6 | -1.9 |
|                       |           | 250.0 | 244.7 | -3.9 | 248.5 | -0.6 | 247.6 | -1.0 |
|                       | Liver     | 15.6  | 14.6  | 1.1  | 15.1  | -3.7 | 14.9  | -4.8 |
|                       |           | 125.0 | 126.4 | -0.9 | 127.0 | 1.6  | 125.0 | 0.0  |
|                       |           | 250.0 | 246.1 | -2.4 | 248.7 | -0.5 | 249.8 | -0.1 |
|                       | Spleen    | 15.6  | 14.5  | 1.1  | 15.5  | -0.8 | 15.5  | -1.2 |
|                       |           | 125.0 | 121.5 | -0.7 | 120.8 | -3.3 | 121.1 | -3.1 |
|                       |           | 250.0 | 246.8 | -1.8 | 249.0 | -0.4 | 248.5 | -0.6 |
|                       | Lung      | 15.6  | 14.5  | 3.8  | 14.9  | -4.8 | 14.7  | -6.0 |
|                       |           | 125.0 | 120.3 | -0.2 | 121.2 | -3.1 | 120.7 | -3.4 |
|                       |           | 250.0 | 243.2 | -3.4 | 245.8 | -1.7 | 244.9 | -2.0 |

|           |       |       |      |       |      |       |      |
|-----------|-------|-------|------|-------|------|-------|------|
| Kidney    | 15.6  | 14.4  | 1.8  | 14.8  | -5.3 | 15.0  | -4.2 |
|           | 125.0 | 125.2 | -1.7 | 124.2 | -0.6 | 125.5 | 0.4  |
|           | 250.0 | 245.0 | -2.5 | 248.4 | -0.7 | 248.6 | -0.6 |
| Stomach   | 15.6  | 14.6  | 1.3  | 15.0  | -3.7 | 15.0  | -3.8 |
|           | 125.0 | 120.6 | -0.2 | 120.0 | -4.0 | 118.8 | -5.0 |
|           | 250.0 | 246.8 | -3.4 | 247.8 | -0.9 | 247.2 | -1.1 |
| Intestine | 15.6  | 14.9  | 1.9  | 15.4  | -1.7 | 15.3  | -2.0 |
|           | 125.0 | 123.9 | -0.0 | 122.8 | -1.7 | 123.1 | -1.5 |
|           | 250.0 | 247.4 | -1.7 | 248.9 | -0.4 | 248.8 | -0.5 |
| Brain     | 15.6  | 14.7  | 1.1  | 15.1  | -3.2 | 15.3  | -2.1 |
|           | 125.0 | 124.8 | -0.6 | 125.1 | 0.1  | 127.1 | 1.7  |
|           | 250.0 | 243.8 | -2.9 | 247.0 | -1.2 | 247.2 | -1.1 |

---
